# Supplementary material
Source: Springer Nature journal article supplement (https://www.springermedizin.de/resource/supplementary/12955_2012_1122_MOESM3_ESM.pdf/9559332)

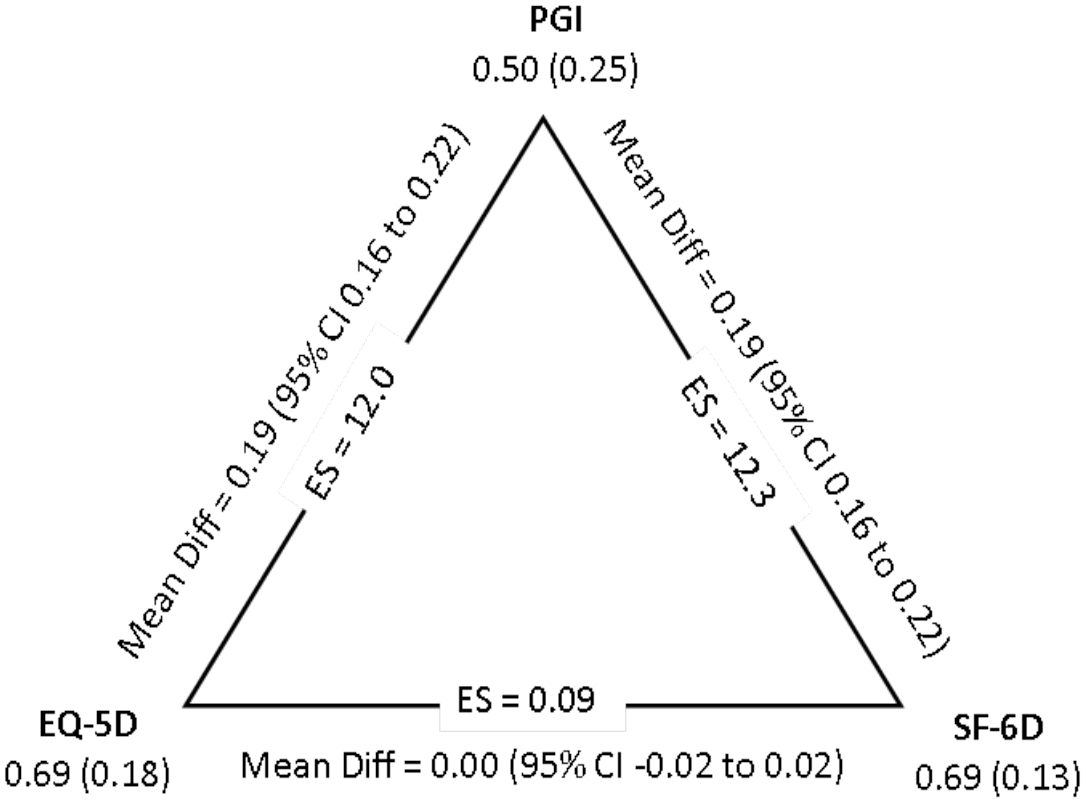

PGI

0.50 (0.25)

Mean Diff = 0.19 (95% CI 0.16 to 0.22)  
ES = 12.0

Mean Diff = 0.19 (95% CI 0.16 to 0.22)  
ES = 12.3

EQ-5D

0.69 (0.18)

ES = 0.09

Mean Diff = 0.00 (95% CI -0.02 to 0.02)

SF-6D

0.69 (0.13)

Supplement: MOESM3 [file 9559332]
